# Supplementary material for: Two subtypes of colorectal tumor with distinct molecular features in familial adenomatous polyposis
Source: PubMed Central journal article supplement (PMC5356641; doi:10.18632/oncotarget.11510), 2016-08-22
Supplement: oncotarget-07-84003-s001.pdf [file oncotarget-07-84003-s001.pdf]

## **Two subtypes of colorectal tumor with distinct molecular features in familial adenomatous polyposis**

Supplementary Materials include:

Supplementary Table S1

Supplementary Table S2

Supplementary Fig. S1

Supplementary Fig. S2

Supplementary Fig. S3

**Supplementary Table S1. Primers for pyrosequencing analysis of methylation marker genes**

| <b>Genes</b>           | <b>PCR Primers (Forward/Reverse)</b> |                               | <b>Sequencing primers</b> |
|------------------------|--------------------------------------|-------------------------------|---------------------------|
| <b>Group-1 markers</b> |                                      |                               |                           |
| <i>SPON1</i>           | <b>F</b>                             | AGGAGGTTGTTGTTTTAATTTTAGTTATA | AGTTATATTTAGGATTTTTTGGAG  |
|                        | <b>R*</b>                            | AATTATTTCTCAAACCTTCCCTCTCTA   |                           |
| <i>TIMP3</i>           | <b>F</b>                             | AGAGATATTTAGTGGTTTAGGTG       | GGTGGGAGTGGGGTTA          |
|                        | <b>R*</b>                            | AAACCCTCCTACCCCTTCT           |                           |
| <i>CACNA1G</i>         | <b>F</b>                             | TGTTTTGGTTTAAGTAGAAGAAAAT     | TGGTTTAAGTAGAAGAAAATTAT   |
|                        | <b>R*</b>                            | ACCCAAATCAACAAAAAAAACCC       |                           |
| <i>MLH1</i>            | <b>F</b>                             | ATGTGGATGAAGTTTAAAGAAGTAAGAT  | ATGGAAGTAGAAGAGGTTTTAGTTT |
|                        | <b>R*</b>                            | AAAACCTCCACCACAAAATA          |                           |
| <i>MINT17</i>          | <b>F*</b>                            | AAGTGGGAGAAGAGGAAGAGAAAAATA   | TATCCCTCCCATCT            |
|                        | <b>R</b>                             | CTATCCTCCCAAACCTTCT           |                           |
| <i>p16INKA</i>         | <b>F*</b>                            | GGTGGGTAGAGGGTTTGTGA          | GGGAGTAGGGGATGG           |
|                        | <b>R</b>                             | CCAATTCCCCTACAAACTT           |                           |
| <b>Group-2 markers</b> |                                      |                               |                           |
| <i>ADAMTS1</i>         | <b>F</b>                             | GTTTTTTGGGGTTTTAATGTAG        | TTAATGTAGAGAGTTGTGTT      |
|                        | <b>R*</b>                            | TCCCCATATCCCTACCCAACCTAC      |                           |
| <i>BNIP3</i>           | <b>F</b>                             | AGAAGTAGATTTATTTTTAGGTGGAATT  | ATTTTTAGGTGGAATTTTAGT     |
|                        | <b>R*</b>                            | AAAAAACCCCATCTCCAACCT         |                           |
| <i>COL4A2</i>          | <b>F</b>                             | TTTTTTGTTGGGAGTAGAAAGG        | GGGAGGGTGGGAGA            |
|                        | <b>R*</b>                            | AACCCCTATAAATACTCCTTAACC      |                           |
| <i>EDIL3</i>           | <b>F</b>                             | GGGATTTTTAGTTTATTTTTATTTAGTTG | TTAGTTTATTTTTATTTAGTTGTT  |
|                        | <b>R*</b>                            | ACTCAACCTCCATATCCCCAATT       |                           |
| <i>EFEMP1</i>          | <b>F*</b>                            | TTGGGAAGTTGAGTAGTTTTAGGG      | AAATCCCCTTTCTTAACA        |
|                        | <b>R</b>                             | ACCCACAAAAAATAAAATCCCCTTCTT   |                           |
| <i>ELMO1</i>           | <b>F</b>                             | GGAGGAAGGAAGAGGAAGTGA         | GAGGAAGTGAGAGTAG          |
|                        | <b>R*</b>                            | CCAACACACCCACTTACACTCTAAAT    |                           |
| <i>PPP1R3C</i>         | <b>F</b>                             | GTGTTTGGGAGTAGATAAG           | TTTTTAGGAGTAGGGTTTTAGTTT  |
|                        | <b>R*</b>                            | CACAACCTCAAACCTTACC           |                           |
| <i>PPP1R14A</i>        | <b>F</b>                             | GGGGGTTGGGATAGATAT            | GGGATTAGGTTTGTGTTG        |
|                        | <b>R*</b>                            | CTCCCCACCAACAACCC             |                           |
| <i>RASSF2</i>          | <b>F</b>                             | AGGGTTGTTAGGTTTTTTTTAGT       | GTTAGGTTTTTTTTAGTTTTGTA   |
|                        | <b>R*</b>                            | CCCATCCCCCAAATCTCTAAAACCTT    |                           |
| <i>STOX2</i>           | <b>F</b>                             | AGGTTGGGGTAGTTGTTAAG          | GGGTAGTTGTTAAGGTTT        |
|                        | <b>R*</b>                            | TCCCATCAAACCTTCTCATTTTCA      |                           |
| <i>TMEFF2</i>          | <b>F</b>                             | ATTTAGGGATTGGGTTTAGT          | AGGGTAGTTAGTTGAGAAGT      |
|                        | <b>R*</b>                            | CCCTCCTTATAACAACAACCT         |                           |
| <i>UCHL1</i>           | <b>F*</b>                            | GGTAGGGTTTTAAATTTTGTAGTTTATT  | CCACCAAATTATCTCACC        |
|                        | <b>R</b>                             | CCACAACCACCAAATTATCT          |                           |
| <i>ZNF447</i>          | <b>F</b>                             | GGGGTAGTTGAGTAGTAGGTGG        | GGTAGGTTTAGGGGATGTAG      |
|                        | <b>R*</b>                            | CCTCACCTCTACCCTATTTAAATC      |                           |
| <i>NEUROG1</i>         | <b>F</b>                             | AGTTTGGGGTTGTTATTTTGTGTTA     | GTTGTTATTTTGTGTTAGTTG     |
|                        | <b>R*</b>                            | AAAAAACCAAACCAAATTCCTC        |                           |

\* Primers with 5'-biotin tag.

**Supplementary Table S2. Primer sets for targeted exon sequencing of *APC* mutation**

| Amplicon_ID | Ion_AmpliSeq_Fwd_Primer | Ion_AmpliSeq_Rev_Primer         |                                  |
|-------------|-------------------------|---------------------------------|----------------------------------|
| 1           | AMPL393460395           | GGCTTCAAGTTGCTTTTTTAATGATCCT    | GTACCTGCTGTAAGTCTTCACTTCA        |
| 2           | AMPL393647274           | TGAAGATGACCTGTTGCAGGAAT         | ACCTTCCTGAATAGCTTCCAATCAAA       |
| 3           | AMPL393703418           | AGACCTGTATTAGTACGCCAGTCA        | AGAGACATATCAGGAAGGGAAGGAC        |
| 4           | AMPL394027070           | CCTTATAGGTCCAAGGGTAGCCA         | TGCCTCAGTTTCCAGTTTTGTAAAGAT      |
| 5           | AMPL396737537           | CCAAAGTCCTAAGCGCCATTC           | GACCAGTGAAGACAAAAGTATACTATCAAA   |
| 6           | AMPL423994143           | AACACTGATTACTTCATCTGGAAAGG      | TGAGTACCAAGCATTGACAACAATGA       |
| 7           | AMPL1073833676          | GTCATCAGCTGAAGATGAAATAGGATGT    | CTGCAGTCTGCTGGATTGGT             |
| 8           | AMPL1381214544          | CTCATGCACCATGACTGACGTA          | CTGATTTGCCITGCTTCATATTCCAAT      |
| 9           | AMPL1481686998          | TCCTGTTTATACTGAGAGCACTGATGAT    | TCCTTCTTCTTCATGCTGTTCTCTTC       |
| 10          | AMPL3659103069          | AGAGGGTGACTGATGATACATGCATA      | CCTGGAAGTTATAAACACAGGTAAGGG      |
| 11          | AMPL4146798162          | CCATTATTGAAAGTGGAGGTGGGATAT     | TAGGTCTTTTGGAGAGTATGAATTCTGTAC   |
| 12          | AMPL4169531152          | GTGTCTTTTTAACAGGAAGTACTTAAACAAC | CGAGAGAAGCTGTACTTGGATCTAC        |
| 13          | AMPL4536989699          | CGAAGAATAGCCAGAATTCAGCAA        | ACATGTTTTCTTTTCTCAGAATAACTACCTA  |
| 14          | AMPL4738848087          | GAATTTGTCTTGGCGAGCAGAT          | AGGAAATCTCATGGCTAAAAGAAGG        |
| 15          | AMPL5138766960          | GAAGATAGAGTCAGAGGAAGTTTGCT      | CTGATTGTTGGTTGGAGTTAGTTC         |
| 16          | AMPL5138803846          | CTCGAGGCAGGACAATGATTCATA        | GGGTCGAATCTCTAGATCTGTAT          |
| 17          | AMPL5138945736          | GCACCTACTGCTGAAAAGAGAGA         | TGTTTCATTCCATTGTCAATTTCTCTG      |
| 18          | AMPL5138987769          | GTGTCAGCCATTCATACCTCTCAG        | AATCGAGGGTTTCAATTTGACCTCTT       |
| 19          | AMPL5189920641          | GCATCCCATCCCAACTTCTTTAATTATT    | AAGCAGGCTGGGTAAACTTGT            |
| 20          | AMPL5189967645          | CCACAAATAGTACTTCTCAGACCGTTTC    | TTGAATCTTTAATGTTGGATTGCGCTT      |
| 21          | AMPL5196704502          | GGAGAGAGAAGCAGCTGTGTAAT         | CCAAGGAAAGGCCATCGGTTTA           |
| 22          | AMPL5665143056          | GCAACCCAAAAGCATGTTAGT           | TTCTCCTTGAGCCTCATCTGTA           |
| 23          | AMPL5665206447          | AGGAAGCATTATGGGACATGGG          | AAAGTTTCTGATAAGTGTGAGCATCT       |
| 24          | AMPL5692057662          | CTCCACTGGAGCTCAGTAAAAGTAAAT     | CCCTAACATACAGGGTGATAAAAAGTGT     |
| 25          | AMPL5692124014          | CATTGCGCCTGCGCATAA              | CTTCTCACCAACAGCCAAC              |
| 26          | AMPL5693252847          | TTTGCATGACTGATGTTAACTCCATCT     | GCTTCTGGAAATATGCATTGAGGACTAA     |
| 27          | AMPL5693677962          | GGGTTCATTCCAAGAAGAGGGT          | AAGTGCAATCAATAACATGCTATCTTTG     |
| 28          | AMPL5693708974          | TGATTGCTTTTTCTCTTGCCTTT         | GCTACATCTCCAAAAGTCAAGTTGTCA      |
| 29          | AMPL5763999285          | AGAGACTTAGTCAAGGGCAGATGA        | CAGCAGGACAGATCTGATGTTCAA         |
| 30          | AMPL5957526178          | TGTGCTCCAACAAAACAAAATCTGT       | CAAATGTGAAACAAGACCCTCAAACAA      |
| 31          | AMPL393540352           | GATGCTGTTCCAGGTAAGTGT           | CCCGAGAAGTGGGGTGGTA              |
| 32          | AMPL395267986           | ACCTGGTGCCTTGAATATCACAT         | AAGGTCAATCATTCAAAGATAGTAAATTGAAG |
| 33          | AMPL396044271           | AGCACTTTAGGTAGAGAAGTTGCAAT      | AGCGTAATACCAGTCTTTTCTCTTTCT      |

---

|    |                |                                  |                                   |
|----|----------------|----------------------------------|-----------------------------------|
| 34 | AMPL434747307  | CAGAGGTTAGTAAATTGCCTTTCTTGTT     | CTGCCTAAAAGTTAGATAAAATCAAATAGTCC  |
| 35 | AMPL674537212  | CTTCGACAAGAGCTAGAAGATAAATCCA     | AAGTGTCTTACCTCAAGTTTACAAGAG       |
| 36 | AMPL1076312570 | CAGTGTACAGCACCTAGA               | TCAAAACTATCAAGTGAAGTACAGAAAG      |
| 37 | AMPL1481653367 | CTCCTTATTTTTACCCTGACCCAAGT       | GGGACATTTTTGACCGCAGTTTT           |
| 38 | AMPL1481656535 | ATTTTATTTTTCAGTGCCAGCTCCTG       | ACAGAAGTTGGTGGCCTTATATCCTAA       |
| 39 | AMPL1481668620 | CTTACAAACAGATATGACCAGAAGGCA      | GAGCCAAAATAAACACAGCCTTATGT        |
| 40 | AMPL1481727237 | TCTTGTTAGAGGGTTTTTGTCTGGAA       | TGTAAAACATACTGTACAAACATACTGGCT    |
| 41 | AMPL3659066251 | AAATTCACAGTAATATGGTTCCCGATGA     | ACAGATTTTTGTTTTGTTGGAGCACAA       |
| 42 | AMPL3751348285 | GATATTACGGAATGTGTCCAGCTTGATA     | ATAAAACATTGCTTACAATTAGGTCTTTTTGA  |
| 43 | AMPL4042686722 | TTCTATTCTTACTGCTAGCATTAAAAACAAAA | TGCTCGCCAAGACAAAATTCCT            |
| 44 | AMPL5138551581 | GTGGGTCAAGTAAAGCACCTTCTA         | ACCTGTTTGGTTGGTAAGGTCTCTGT        |
| 45 | AMPL5138676396 | GATACCATTCTACAGAAGGCAGAAG        | TGGTGAAGTTGGTTCTTTTTCTTACCA       |
| 46 | AMPL5138696684 | CATGGTCTATCCCCTGATTCAGAAAAT      | CCAATGTACTTTTCTCCCCTGGTTTT        |
| 47 | AMPL5138764053 | GCCTACCAATTATAGTGAACGTTACTCT     | CATTAGATGAAGGTGTGGACGTATTCTC      |
| 48 | AMPL5138854074 | GGCTAAAGTTACCAGCCACACA           | GGTCAATGTCCTGAGAGAACTCA           |
| 49 | AMPL5139022082 | TGTGGAATTAAGAATAATGCCTCCAGTT     | CTTGCCACAGGTGGAGGTAAT             |
| 50 | AMPL5189652396 | CTGGTATTTGAGGTGAGATGGCT          | GTGGCAACAGTCTTCTCAATTGTTTT        |
| 51 | AMPL5189763000 | CCGGTGATTGACAGTGTTCAGAA          | GTTTGCTTGAGCTGCTAGAACTG           |
| 52 | AMPL5189869306 | CCAGGCACAACTCCAGTTTTAA           | GTGCTTACTCGAGGAAGGGATG            |
| 53 | AMPL5269795675 | TGTCAGTAGTAGTGATGGTTATGGTAA      | TTCATTCTGTGAAGGACTTTGCCT          |
| 54 | AMPL5269851832 | TGTTTATCATAACAGACTTCATTTGGA      | AATGTCTTAGCAAAGTAGTCATGGCA        |
| 55 | AMPL5665324055 | CCCACAGGTGAAAATGGTGTAT           | CTTGTCATCAGGCTGTGAGTGAA           |
| 56 | AMPL5665328258 | GAAACAAAAAGCCCTAGAAGCAGAATT      | CAGAACGAGAACTATCTAAGCTTCCTC       |
| 57 | AMPL5691799956 | GAGGACAACAAAGAATGGAGCATA         | CTTAGATGTTTTACAAAAGCAGGCACA       |
| 58 | AMPL5691890571 | TTGCAACTGGGTCTGACATGA            | AAGGAAGACTTCCCTCCACTGTATAA        |
| 59 | AMPL5693711929 | CAGTGAGGGACGGCAATAG              | CTCCGGTAAGTAAGAGTGCCAA            |
| 60 | AMPL5693742773 | CTAAGACGATATGCTGGAATGGCTT        | GCGAATGTGAAGCACAGGTTTT            |
| 61 | AMPL395034078  | ACATGATGTGCATAGAGATAGCTACAGT     | TCATGTCTCATTAATAAAAGAGCAGCCA      |
| 62 | AMPL674483179  | AGACTCCACTGTTTCATCCTCTTAGA       | CATATGAAGCTGCAGCCATCCT            |
| 63 | AMPL675154644  | GTTTGACAAAGGAAGAACAGATAGCAAA     | CATAGAGCATAGCGTAGCCTGTAAATTA      |
| 64 | AMPL675649764  | AAGGGACACACTTCACTTTCCC           | GCTTGTCTGAGATGACCTCTGTTA          |
| 65 | AMPL707909899  | GAGGCACTCTGTATGGTTAGGAAAA        | TCTATCTGTAGTGTTCATTATTTAAAGACAAGC |
| 66 | AMPL1481706928 | TGCTTCTTGCTGATCTTGACAAAAGA       | CAGGCCATAAGTTGGGTAAAACATATTG      |
| 67 | AMPL1485024388 | GGGTGGAGAACTGGCATAAAA            | TGGCCTGTAGTCCCCTAATTTAA           |
| 68 | AMPL3897592468 | TGATTAATTTGCAGGTTATTGCGAGTG      | AGGTACCTTTTTAACTTCTAAAGCACAT      |
| 69 | AMPL4169443268 | TGCATTAAGAGTAAAATTCCTCTTACTGT    | GCTGCTTGCATTGCTATTACATGA          |

---

---

|    |                |                              |                               |
|----|----------------|------------------------------|-------------------------------|
| 70 | AMPL4169525311 | GGTGCCTGCTTTGAGAGTGA         | CCATAGCTTCATCTTCAATACTTCCTTGT |
| 71 | AMPL4536546825 | AGAATGATTTGACATAACCCTGAGCTT  | CGTATACGAAGTATGTCCTTTTCGAT    |
| 72 | AMPL4536993154 | TCTGGGAACCAAGGTAACAGAAGA     | TGCCACCACACTGGCTAAA           |
| 73 | AMPL5138555689 | CGGTTTGCTTTTCTCATAAATCCTCTC  | TTTTTGGCATTGCGGAGCTTATAC      |
| 74 | AMPL5138683853 | TCCAGGTAGACAGATGAGCCA        | GCTTGGAGCTTCTTTGATGAAAGT      |
| 75 | AMPL5138742097 | TCTGCACCCAACAAAAATCAGTTAGA   | GCGTGTAAATGATGAGGTGAATCAAA    |
| 76 | AMPL5138765656 | ACAAGTAATAAAGGCCACGAATTCT    | GGAGCTATTTCGAACTCCTGGAA       |
| 77 | AMPL5138795614 | CCCCACTCATGTTTAGCAGATGTA     | GCAGCTTGCTTAGGTCCACTC         |
| 78 | AMPL5138822647 | AACCGAACATATGTCTTCAAGCAGT    | CTGCTTCCTGTGTGCTGCTGATT       |
| 79 | AMPL5189736613 | ACTTTATTTGTGGTAGGTACAGTTCTGG | AGTGCCCCACCATGCTTAAAA         |
| 80 | AMPL5189852444 | AGTTCTATAGTGGAACGTACCCCAT    | CAGATGTCACAAGGTAAGACCCA       |
| 81 | AMPL5189937520 | CGTGAGCACAGCAAACATTCAT       | AGCACCATTTGTAGCACCTGAG        |
| 82 | AMPL5238387025 | TGGTACAATCATATTATGCCTTTTGTCT | AATGAGGTTCTTGAGCATGCTAACT     |
| 83 | AMPL5269967340 | CAGATGAGCAGTTGAACTCTGGA      | TGTGGTTGGAACCTGAGGTGTTT       |
| 84 | AMPL5665412864 | TGCAGCACTCCACAACATCA         | TTTCTCCTCTTAGTCATAAAGACAGCAT  |
| 85 | AMPL5665416512 | GTTACCCAGCTCCTCTTCATCAA      | GGTAGACCCAGAACTTCTGTCTTC      |
| 86 | AMPL5665459931 | CCAGCCCAGACTGCTTCAAA         | GCATATCATCCCCCGGTGTA          |
| 87 | AMPL5693644155 | ACTTAGATAGCAGTAATTTCCCTGGAGT | CCAGTACTTTCTCTGCTTCCATTTACAA  |
| 88 | AMPL5693806435 | AGATGGTGCACTTGCATTTTTGG      | CCTGTGGTCTCATTTGTAGCTAT       |
| 89 | AMPL5694593983 | CCCTTTGCCCGCTTCTG            | GGGTGAGACATGGAGAGAAGAGA       |
| 90 | AMPL6417171619 | CTCCAATGCCTGTACTGTGTCT       | CATAGAAGTACTTGAAGTGGTTTGCAAC  |

---

Supplementary Fig. S1

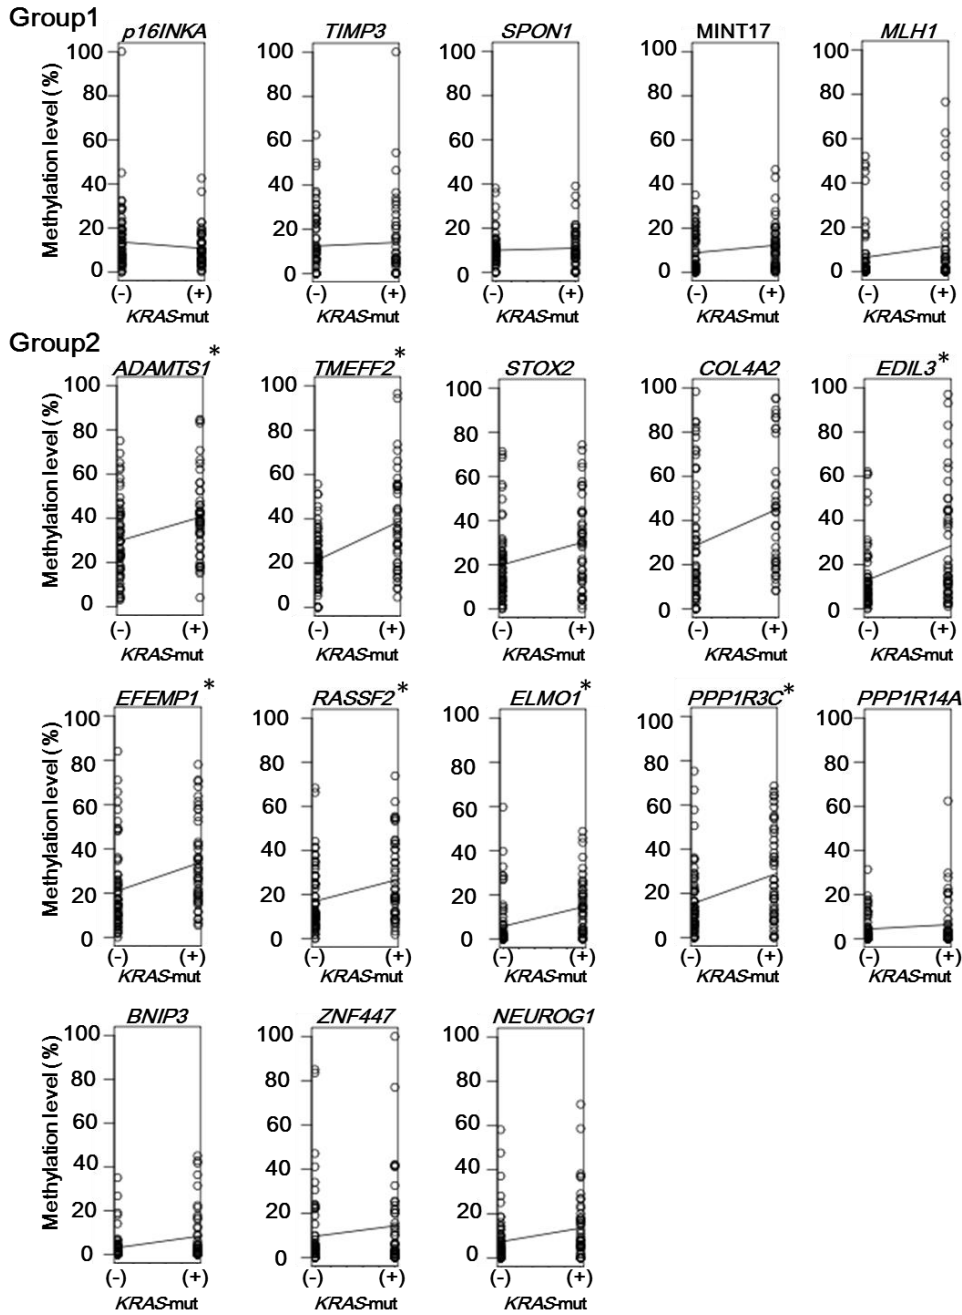

**Supplementary Fig. S1.**

Comparison between methylation levels and *KRAS*-mutation using linear single regression model. Eight of 14 Group-2 markers (*ADAMTS1*, *TMEFF2*, *EDIL3*, *EFEMP1*, *RASSF2*, *ELMO1*, and *PPP1R3C*) showed significant correlation between higher methylation level and *KRAS*-mutation(+) status ( $*P < 0.004$ ), while none of Group-1 markers did. Since 14 Group-2 markers were evaluated,  $P$ -values  $< 0.004$  (i.e.  $0.05/14$ ) were considered significant.

Supplementary Fig. S2

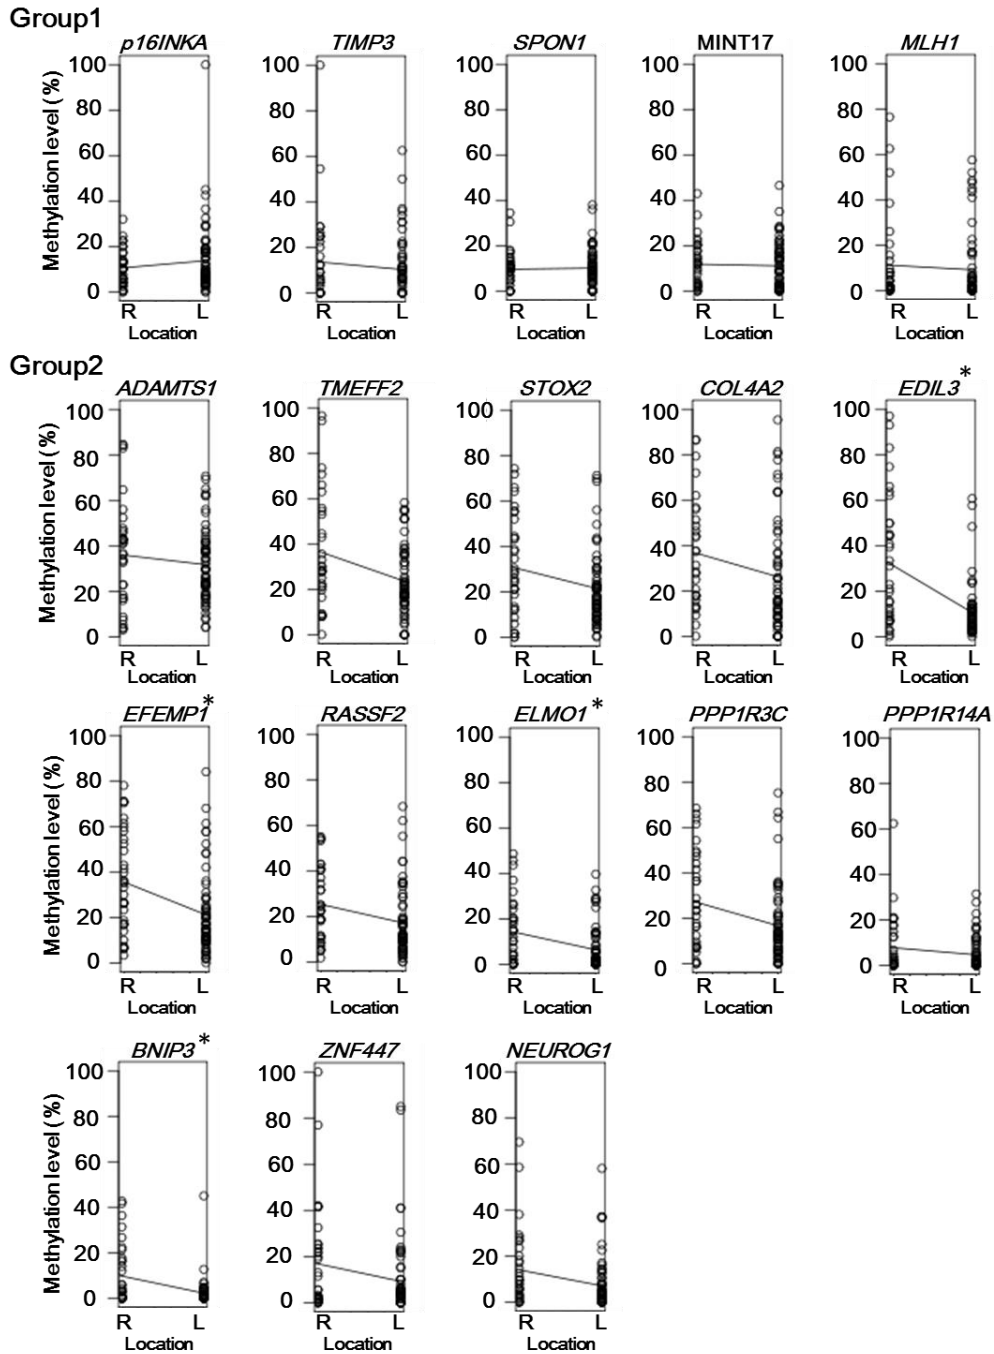

**Supplementary Fig. S2.**

Comparison between methylation levels and tumor location using linear single regression model. Five of 14 Group-2 markers (*EDIL3*, *EFEMP1*, *UCHL1*, *ELMO1*, and *BNIP3*) showed significant correlation between higher methylation level and proximal location (\* $P < 0.004$ ), while none of Group-1 markers did. Since 14 Group-2 markers were evaluated,  $P$ -values  $< 0.004$  (i.e.,  $0.05/14$ ) were considered significant.

Supplementary Fig. S3

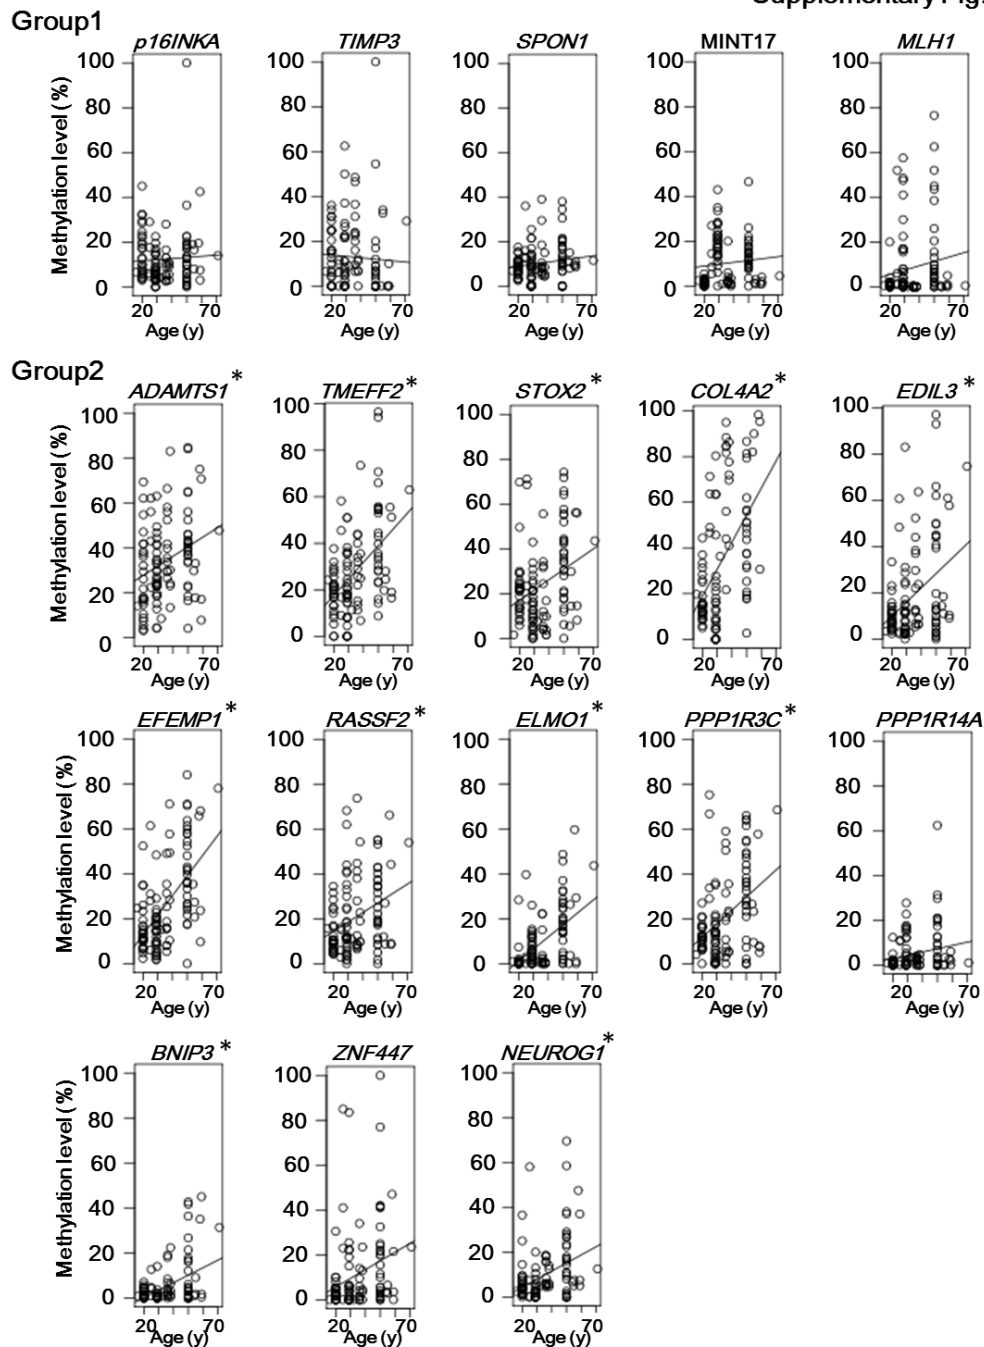

**Supplementary Fig. S3.**

Comparison between methylation levels and age using linear single regression model. Twelve of 14 Group-2 markers (*ADAMTS1*, *TMEFF2*, *STOX2*, *COL4A2*, *EDIL3*, *EFEMP1*, *RASSF2*, *ELMO1*, *PPP1R3C*, *BNIP3*, and *NEUROG1*) showed a significant correlation between higher methylation level and age (\* $P < 0.004$ ), while none of Group-1 markers did. Since 14 Group-2 markers were evaluated,  $P$ -values  $< 0.004$  (i.e.,  $0.05/14$ ) were considered to be significant.
